# Supplementary material
Source: PubMed Central journal article supplement (PMC7167679)
Supplement: PMIC-11-64-s001.pdf [file PMIC-11-64-s001.pdf]

# PROTEOMICS

**Supporting Information**

**for Proteomics**

**DOI 10.1002/pmic.201000309**

Mijke W. Vogels, Bas W. M. van Balkom, Dora V. Kaloyanova,

Joseph J. Batenburg, Albert J. Heck, J. Bernd Helms,

Peter J. M. Rottier and Cornelis A. M. de Haan

**Identification of host factors involved in coronavirus replication by quantitative proteomics analysis**

**Supporting information Table S1** List of identified proteins in a Golgi-enriched fraction of MHV-infected HeLa-CEACAM1a cells versus mock-infected cells by SILAC.

| Protein ID | Protein                                                                | Gene symbol | Pept ID Exp A <sup>a</sup> | Pept ID Exp B <sup>b</sup> | Pept ID Exp C <sup>c</sup> | Mean ratio <sup>d</sup> | Stdev (ratio) <sup>e</sup> | p-value |
|------------|------------------------------------------------------------------------|-------------|----------------------------|----------------------------|----------------------------|-------------------------|----------------------------|---------|
| IPI0000138 | Alpha-1.3-mannosyl-glycoprotein 2-beta-N-acetylglucosaminyltransferase | MGAT1       | 3                          | 1                          | 3                          | 0.95                    | 0.098                      | 0.17    |
| IPI0000494 | 60S ribosomal protein L5                                               | RPL5        | 6                          | 8                          | 13                         | 0.71                    | 0.301                      | 0.05    |
| IPI0000643 | BAG family molecular chaperone regulator 2                             | BAG2        | 1                          | 4                          | 3                          | 1.08                    | 0.250                      | 0.25    |
| IPI0000690 | Isoform 1of Apoptosis-inducing factor 1. mitochondrial precursor       | AIFM1       | 3                          | 9                          | 6                          | 0.83                    | 0.066                      | 0.01    |
| IPI0000816 | 14-3-3 protein epsilon                                                 | YWHAE       | 2                          | 3                          | 6                          | 1.28                    | 0.581                      | 0.20    |
| IPI0000856 | Isoform 1of Pleckstrin homology domain-containing family C member 1    | PLEKHC1     | 3                          | 2                          | 4                          | 1.73                    | 0.809                      | 0.12    |
| IPI0000861 | Isoform 1of LIM and SH3 domain protein 1                               | LASP1       | 5                          | 9                          | 11                         | 1.03                    | 0.396                      | 0.44    |
| IPI0000874 | Peroxiredoxin-1                                                        | PRDX1       | 5                          | 10                         | 16                         | 1.14                    | 0.433                      | 0.27    |
| IPI0000875 | Elongation factor 1-gamma                                              | EEF1G       | 3                          | 1                          | 3                          | 0.89                    | 1.089                      | 0.41    |
| IPI0000877 | Hypoxia up-regulated protein 1 precursor                               | HYOU1       | 1                          | 4                          | 3                          | 1.11                    | 0.209                      | 0.16    |
| IPI0001632 | Hypothetical protein LOC57648                                          | KIAA1522    | 2                          | 1                          | 2                          | 1.17                    | 0.352                      | 0.20    |
| IPI0001871 | PRKC apoptosis WT1 regulator protein                                   | PAWR        | 2                          | 4                          | 9                          | 0.82                    | 0.318                      | 0.13    |
| IPI0001893 | Isoform A of Protocadherin-7 precursor                                 | PCDH7       | 2                          | 10                         | 13                         | 0.82                    | 0.261                      | 0.10    |
| IPI0001960 | Chloride intracellular channel protein 4                               | CLIC4       | 2                          | 4                          | 9                          | 1.55                    | 0.901                      | 0.17    |
| IPI0002070 | Leucine-rich repeat-containing protein 8A                              | LRRRC8A     | 5                          | 5                          | 5                          | 0.77                    | 0.202                      | 0.04    |
| IPI0002406 | Lutheran blood group glycoprotein precursor                            | BCAM        | 3                          | 5                          | 3                          | 1.21                    | 0.344                      | 0.15    |
| IPI0002412 | Palmitoyl-protein thioesterase 1 precursor                             | PPT1        | 6                          | 4                          | 5                          | 1.73                    | 0.333                      | 0.03    |
| IPI0002460 | Isoform 1 of Annexin A7                                                | ANXA7       | 5                          | 6                          | 10                         | 1.37                    | 0.884                      | 0.23    |
| IPI0002520 | Serine hydroxymethyltransferase. mitochondrial precursor               | SHMT2       | 3                          | 3                          | 3                          | 1.04                    | 0.965                      | 0.46    |
| IPI0002745 | Cathepsin Z precursor                                                  | CTSZ        | 4                          | 2                          | 5                          | 1.62                    | 0.610                      | 0.09    |
| IPI0002821 | 60S ribosomal protein L14                                              | RPL14       | 4                          | 5                          | 4                          | 0.75                    | 0.214                      | 0.04    |
| IPI0003348 | Guanine nucleotide-binding protein G(I)/G(S)/G(T) subunit beta-2       | GNB2        | 10                         | 4                          | 10                         | 0.88                    | 0.342                      | 0.22    |
| IPI0003362 | HSPA5 protein                                                          | HSPA5       | 28                         | 30                         | 31                         | 1.18                    | 0.462                      | 0.24    |
| IPI0003527 | Ezrin-radixin-moesin-binding phosphoprotein 50                         | SLC9A3R1    | 9                          | 10                         | 20                         | 1.00                    | 0.609                      | 0.49    |
| IPI0003833 | Mitochondrial carrier homolog 2                                        | MTCH2       | 1                          | 2                          | 3                          | 0.98                    | 0.739                      | 0.48    |
| IPI0003865 | Isoform 1of Heat shock cognate 71 kDa protein                          | HSPA8       | 22                         | 22                         | 23                         | 1.03                    | 0.464                      | 0.44    |
| IPI0003918 | 60S ribosomal protein L4                                               | RPL4        | 10                         | 2                          | 3                          | 0.75                    | 0.146                      | 0.02    |
| IPI0004397 | Ras-related protein Ral-B precursor                                    | RALB        | 1                          | 2                          | 4                          | 1.01                    | 0.342                      | 0.47    |
| IPI0004416 | Charged multivesicular body protein 2a                                 | CHMP2A      | 3                          | 6                          | 7                          | 1.25                    | 0.106                      | 0.02    |
| IPI0004503 | Lysosomal-associated membrane protein 1                                | LAMP1       | 3                          | 4                          | 3                          | 1.97                    | 0.183                      | 0.01    |

|             |                                                                                |          |    |    |    |      |       |      |
|-------------|--------------------------------------------------------------------------------|----------|----|----|----|------|-------|------|
| IPI00004669 | Polypeptide N-acetylgalactosaminyltransferase 2                                | GALNT2   | 23 | 15 | 22 | 1.03 | 0.319 | 0.41 |
| IPI00004671 | Golgin subfamily B member 1                                                    | GOLGB1   | 37 | 59 | 33 | 1.23 | 0.164 | 0.04 |
| IPI00004902 | Isoform 1 of Electron transfer flavoprotein subunit beta                       | ETFB     | 7  | 2  | 3  | 1.23 | 1.437 | 0.38 |
| IPI00004962 | Golgi integral membrane protein 4                                              | GOLIM4   | 4  | 13 | 15 | 1.40 | 0.287 | 0.05 |
| IPI00005087 | Tropomodulin-3                                                                 | TMOD3    | 3  | 3  | 7  | 1.22 | 0.371 | 0.16 |
| IPI00005129 | Isoform 1of Secretory carrier-associated membrane protein 1                    | SCAMP1   | 2  | 3  | 1  | 1.12 | 0.383 | 0.27 |
| IPI00005159 | Actin-related protein 2                                                        | ACTR2    | 2  | 2  | 9  | 0.92 | 0.218 | 0.21 |
| IPI00005160 | Actin-related protein 2/3 complex subunit 1B                                   | ARPC1B   | 5  | 3  | 2  | 0.92 | 0.316 | 0.30 |
| IPI00005161 | Actin-related protein 2/3 complex subunit 2                                    | ARPC2    | 5  | 1  | 3  | 0.82 | 0.463 | 0.20 |
| IPI00005162 | Actin-related protein 2/3 complex subunit 3                                    | ARPC3    | 5  | 2  | 5  | 0.81 | 0.301 | 0.11 |
| IPI00005202 | Membrane-associated progesterone receptor component 2                          | PGRMC2   | 4  | 3  | 5  | 1.46 | 0.225 | 0.03 |
| IPI00005537 | 39S ribosomal protein L12. mitochondrial precursor                             | MRPL12   | 4  | 3  | 5  | 0.94 | 0.552 | 0.40 |
| IPI00005614 | Isoform Long of Spectrin beta chain. brain 1                                   | SPTBN1   | 18 | 38 | 41 | 0.83 | 0.809 | 0.31 |
| IPI00005707 | Macrophage mannose receptor 2 precursor                                        | MRC2     | 1  | 3  | 3  | 1.18 | 0.210 | 0.10 |
| IPI00005745 | Serine palmitoyltransferase 1                                                  | SPTLC1   | 2  | 2  | 1  | 2.23 | 1.002 | 0.09 |
| IPI00005969 | F-actin-capping protein subunit alpha-1                                        | CAPZA1   | 4  | 2  | 4  | 1.06 | 0.069 | 0.08 |
| IPI00006034 | Cysteine-rich protein 2                                                        | CRIP2    | 3  | 2  | 5  | 0.86 | 0.272 | 0.15 |
| IPI00006052 | Prefoldin subunit 2                                                            | PFDN2    | 3  | 3  | 3  | 1.31 | 0.448 | 0.13 |
| IPI00006211 | Isoform 1of Vesicle-associated membrane protein-associated protein B/C         | VAPB     | 4  | 5  | 6  | 1.29 | 0.373 | 0.11 |
| IPI00006451 | Vesicle-fusing ATPase                                                          | NSF      | 2  | 4  | 3  | 1.33 | 0.458 | 0.13 |
| IPI00006482 | Isoform Long of Sodium/potassium-transporting ATPase subunit alpha-1 precursor | ATP1A1   | 25 | 27 | 25 | 0.87 | 0.292 | 0.18 |
| IPI00006666 | Monocarboxylate transporter 4                                                  | SLC16A3  | 2  | 1  | 4  | 0.94 | 0.337 | 0.35 |
| IPI00006865 | Vesicle-trafficking protein SEC22b                                             | SEC22B   | 9  | 9  | 10 | 1.43 | 0.035 | 0.00 |
| IPI00006935 | Eukaryotic translation initiation factor 5A-2                                  | EIF5A2   | 5  | 2  | 3  | 1.13 | 0.647 | 0.34 |
| IPI00007034 | Isoform 2 of UBA domain-containing protein PHGDHL1 precursor                   | UBAC2    | 2  | 6  | 5  | 1.26 | 0.377 | 0.13 |
| IPI00007058 | Coronin-1B                                                                     | CORO1B   | 5  | 4  | 4  | 1.15 | 0.626 | 0.32 |
| IPI00007067 | Golgi-associated plant pathogenesis-related protein 1                          | C9orf19  | 4  | 2  | 2  | 0.86 | 0.127 | 0.05 |
| IPI00007084 | Mitochondrial aspartate-glutamate carrier protein                              | SLC25A13 | 12 | 9  | 6  | 0.81 | 0.270 | 0.10 |
| IPI00007188 | ADP/ATP translocase 2                                                          | SLC25A5  | 9  | 6  | 6  | 0.75 | 0.363 | 0.10 |
| IPI00007289 | Alkaline phosphatase. placental type precursor                                 | ALPP     | 2  | 2  | 3  | 1.16 | 0.708 | 0.33 |
| IPI00007611 | ATP synthase subunit O. mitochondrial precursor                                | ATP5O    | 2  | 4  | 6  | 0.85 | 0.428 | 0.22 |
| IPI00007682 | Vacuolar ATP synthase catalytic subunit A                                      | ATP6V1A  | 3  | 7  | 5  | 0.98 | 0.530 | 0.47 |
| IPI00007750 | Tubulin alpha-4A chain                                                         | TUBA4A   | 2  | 3  | 2  | 1.02 | 0.886 | 0.48 |
| IPI00007752 | Tubulin beta-2C chain                                                          | TUBB2C   | 6  | 4  | 4  | 1.16 | 1.195 | 0.39 |
| IPI00007755 | Ras-related protein Rab-21                                                     | RAB21    | 5  | 3  | 3  | 1.13 | 0.483 | 0.29 |

|             |                                                              |          |    |    |    |      |       |      |
|-------------|--------------------------------------------------------------|----------|----|----|----|------|-------|------|
| IPI00007765 | Stress-70 protein. mitochondrial precursor                   | HSPA9    | 12 | 20 | 16 | 0.87 | 1.120 | 0.39 |
| IPI00007812 | Vacuolar ATP synthase subunit B. brain isoform               | ATP6V1B2 | 4  | 7  | 10 | 1.01 | 0.406 | 0.48 |
| IPI00007935 | PDZ and LIM domain protein 5                                 | PDLIM5   | 6  | 5  | 8  | 0.91 | 0.474 | 0.33 |
| IPI00007940 | ER lipid raft associated 1                                   | ERLIN1   | 1  | 4  | 8  | 1.48 | 0.255 | 0.03 |
| IPI00008085 | Zinc transporter ZIP10 precursor                             | SLC39A10 | 1  | 3  | 3  | 1.14 | 0.446 | 0.27 |
| IPI00008338 | Isoform 2 of Multidrug resistance-associated protein 1       | ABCC1    | 3  | 3  | 3  | 0.92 | 0.115 | 0.11 |
| IPI00008418 | Diablo homolog. mitochondrial precursor                      | DIABLO   | 2  | 1  | 3  | 0.84 | 0.386 | 0.19 |
| IPI00008438 | 40S ribosomal protein S10                                    | RPS10    | 4  | 2  | 6  | 0.77 | 0.295 | 0.08 |
| IPI00008454 | DnaJ homolog subfamily B member 11 precursor                 | DNAJB11  | 4  | 4  | 2  | 1.20 | 0.254 | 0.11 |
| IPI00008494 | Intercellular adhesion molecule 1 precursor                  | ICAM1    | 2  | 2  | 3  | 0.75 | 0.433 | 0.12 |
| IPI00008524 | Isoform 1 of Polyadenylate-binding protein 1                 | PABPC1   | 9  | 8  | 8  | 0.81 | 0.298 | 0.11 |
| IPI00008529 | 60S acidic ribosomal protein P2                              | RPLP2    | 6  | 4  | 6  | 0.86 | 0.337 | 0.18 |
| IPI00008530 | 60S acidic ribosomal protein P0                              | RPLP0    | 6  | 3  | 6  | 0.84 | 0.293 | 0.13 |
| IPI00008986 | Large neutral amino acids transporter small subunit 1        | SLC7A5   | 5  | 4  | 6  | 0.94 | 0.278 | 0.33 |
| IPI00009057 | Isoform A of Ras GTPase-activating protein-binding protein 2 | G3BP2    | 6  | 3  | 4  | 0.60 | 0.305 | 0.03 |
| IPI00009111 | Trophoblast glycoprotein precursor                           | TPBG     | 2  | 3  | 4  | 0.69 | 0.171 | 0.02 |
| IPI00009123 | Nucleobindin-2 precursor                                     | NUCB2    | 1  | 2  | 4  | 1.31 | 0.323 | 0.09 |
| IPI00009225 | Syntaxin-8                                                   | STX8     | 5  | 5  | 4  | 1.63 | 0.322 | 0.03 |
| IPI00009236 | Isoform Alpha of Caveolin-1                                  | CAV1     |    |    |    | 0.90 | 0.308 | 0.25 |
| IPI00009253 | Alpha-soluble NSF attachment protein                         | NAPA     | 4  | 4  | 5  | 1.68 | 0.503 | 0.06 |
| IPI00009329 | Utrophin                                                     | UTRN     | 8  | 5  | 7  | 1.10 | 0.300 | 0.26 |
| IPI00009342 | Ras GTPase-activating-like protein IQGAP1                    | IQGAP1   | 24 | 14 | 24 | 2.16 | 1.046 | 0.10 |
| IPI00009368 | Sideroflexin-1                                               | SFXN1    | 5  | 7  | 3  | 0.84 | 0.286 | 0.13 |
| IPI00009505 | Isoform 1 of Beta-2-syntrophin                               | SNTB2    | 4  | 4  | 7  | 0.99 | 0.214 | 0.47 |
| IPI00009747 | Lanosterol synthase                                          | LSS      | 0  | 2  | 2  | 1.13 | 0.228 | 0.16 |
| IPI00009904 | Protein disulfide-isomerase A4 precursor                     | PDIA4    | 6  | 8  | 14 | 1.22 | 0.246 | 0.09 |
| IPI00009923 | Isoform 1 of Prolyl 4-hydroxylase subunit alpha-1 precursor  | P4HA1    | 2  | 4  | 1  | 0.90 | 0.442 | 0.30 |
| IPI00009946 | Mitochondrial import receptor subunit TOM34                  | TOMM34   | 3  | 1  | 3  | 1.27 | 0.842 | 0.28 |
| IPI00009960 | Isoform 1 of Mitochondrial inner membrane protein            | IMMT     | 12 | 23 | 3  | 0.78 | 0.110 | 0.02 |
| IPI00010348 | Deoxyribonuclease-2-alpha precursor                          | DNASE2   | 3  | 2  | 4  | 1.73 | 0.427 | 0.04 |
| IPI00010414 | PDZ and LIM domain protein 1                                 | PDLIM1   | 7  | 3  | 2  | 1.49 | 1.428 | 0.28 |
| IPI00010428 | Cell division cycle-associated protein 3                     | CDCA3    | 1  | 2  | 5  | 0.85 | 0.409 | 0.21 |
| IPI00010438 | Isoform SNAP-23a of Synaptosomal-associated protein 23       | SNAP23   | 4  | 6  | 9  | 1.20 | 0.696 | 0.29 |
| IPI00010440 | HS1-associating protein X-1                                  | HAX1     | 2  | 2  | 2  | 0.88 | 0.436 | 0.28 |
| IPI00010470 | Isoform SNAP-25b of Synaptosomal-associated protein 25       | SNAP25   | 4  | 3  | 3  | 0.92 | 0.956 | 0.43 |

|             |                                                                         |          |    |    |    |      |       |      |
|-------------|-------------------------------------------------------------------------|----------|----|----|----|------|-------|------|
| IPI00010676 | Isoform 1 of Urokinase plasminogen activator surface receptor precursor | PLAUR    | 4  | 6  | 8  | 0.88 | 0.104 | 0.04 |
| IPI00010720 | T-complex protein 1 subunit epsilon                                     | CCT5     | 3  | 4  | 4  | 2.14 | 0.597 | 0.04 |
| IPI00010779 | Isoform 1 of Tropomyosin alpha-4 chain                                  | TPM4     | 7  | 9  | 13 | 1.23 | 0.814 | 0.29 |
| IPI00010796 | Protein disulfide-isomerase precursor                                   | P4HB     | 15 | 16 | 24 | 1.21 | 0.344 | 0.15 |
| IPI00010896 | Chloride intracellular channel protein 1                                | CLIC1    | 7  | 4  | 7  | 2.34 | 0.976 | 0.08 |
| IPI00011200 | D-3-phosphoglycerate dehydrogenase                                      | PHGDH    | 8  | 6  | 5  | 1.71 | 0.885 | 0.14 |
| IPI00011229 | Cathepsin D precursor                                                   | CTSD     | 8  | 5  | 8  | 1.76 | 0.126 | 0.00 |
| IPI00011253 | 40S ribosomal protein S3                                                | RPS3     | 11 | 8  | 10 | 0.81 | 0.166 | 0.04 |
| IPI00011284 | Isoform Membrane-bound of Catechol O-methyltransferase                  | COMT     | 2  | 1  | 2  | 1.79 | 0.260 | 0.02 |
| IPI00011302 | CD59 glycoprotein precursor                                             | CD59     | 5  | 3  | 4  | 0.90 | 0.334 | 0.26 |
| IPI00011654 | Tubulin beta chain                                                      | TUBB     | 20 | 14 | 20 | 1.20 | 0.925 | 0.33 |
| IPI00011937 | Peroxiredoxin-4                                                         | PRDX4    | 2  | 1  | 4  | 1.27 | 0.386 | 0.13 |
| IPI00012011 | Cofilin-1                                                               | CFL1     | 12 | 4  | 9  | 1.56 | 0.996 | 0.19 |
| IPI00012442 | Ras GTPase-activating protein-binding protein 1                         | G3BP1    | 6  | 7  | 9  | 0.65 | 0.086 | 0.00 |
| IPI00012451 | Guanine nucleotide-binding protein subunit beta-4                       | GNB4     | 2  | 2  | 3  | 0.84 | 0.163 | 0.06 |
| IPI00012535 | DnaJ homolog subfamily A member 1                                       | DNAJA1   | 4  | 2  | 7  | 0.92 | 0.677 | 0.39 |
| IPI00012645 | Isoform 1 of Spectrin beta chain. brain 2                               | SPTBN2   | 3  | 6  | 4  | 0.66 | 0.447 | 0.07 |
| IPI00012750 | 40S ribosomal protein S25                                               | RPS25    | 6  | 6  | 4  | 0.83 | 0.084 | 0.02 |
| IPI00012772 | 60S ribosomal protein L8                                                | RPL8     | 7  | 4  | 4  | 0.92 | 0.731 | 0.40 |
| IPI00012837 | Kinesin heavy chain                                                     | KIF5B    | 1  | 5  | 5  | 0.81 | 0.610 | 0.24 |
| IPI00013219 | Integrin-linked protein kinase                                          | ILK      | 2  | 3  | 3  | 1.84 | 0.389 | 0.03 |
| IPI00013296 | 40S ribosomal protein S18                                               | RPS18    | 9  | 4  | 7  | 0.76 | 0.360 | 0.10 |
| IPI00013297 | 28 kDa heat- and acid-stable phosphoprotein                             | PDAP1    | 1  | 5  | 2  | 0.76 | 0.170 | 0.03 |
| IPI00013485 | 40S ribosomal protein S2                                                | RPS2     | 3  | 1  | 3  | 0.74 | 0.230 | 0.04 |
| IPI00013508 | Alpha-actinin-1                                                         | ACTN1    | 9  | 9  | 6  | 1.52 | 1.362 | 0.26 |
| IPI00013744 | Integrin alpha-2 precursor                                              | ITGA2    | 1  | 3  | 6  | 1.08 | 0.401 | 0.34 |
| IPI00013808 | Alpha-actinin-4                                                         | ACTN4    | 39 | 27 | 31 | 1.73 | 1.471 | 0.23 |
| IPI00013847 | Cytochrome b-c1 complex subunit 1. mitochondrial precursor              | UQCRC1   | 13 | 3  | 7  | 0.81 | 0.350 | 0.14 |
| IPI00013881 | Heterogeneous nuclear ribonucleoprotein H                               | HNRPH1   | 2  | 1  | 2  | 0.79 | 0.420 | 0.15 |
| IPI00013890 | Isoform 1 of 14-3-3 protein sigma                                       | SFN      | 3  | 2  | 2  | 1.24 | 0.736 | 0.27 |
| IPI00013894 | Stress-induced-phosphoprotein 1                                         | STIP1    | 1  | 4  | 2  | 1.29 | 0.872 | 0.27 |
| IPI00013912 | Uncharacterized protein C1orf198                                        | C1orf198 | 3  | 1  | 4  | 0.95 | 0.713 | 0.44 |
| IPI00013930 | Syntaxin-6                                                              | STX6     | 2  | 3  | 1  | 1.03 | 0.471 | 0.45 |
| IPI00013981 | Proto-oncogene tyrosine-protein kinase Yes                              | YES1     | 4  | 1  | 7  | 0.95 | 0.065 | 0.10 |
| IPI00014177 | Septin-2                                                                | SEPT2    | 5  | 7  | 12 | 0.66 | 0.321 | 0.04 |

|             |                                                                                |          |    |    |    |      |       |      |
|-------------|--------------------------------------------------------------------------------|----------|----|----|----|------|-------|------|
| IPI00014230 | Complement component 1 Q subcomponent-binding protein. mitochondrial precursor | C1QBP    | 2  | 3  | 1  | 1.00 | 1.269 | 0.50 |
| IPI00014236 | Isoform 1 of Zinc transporter ZIP14                                            | SLC39A14 | 1  | 3  | 3  | 1.04 | 0.790 | 0.46 |
| IPI00014377 | Ras-related protein Rab-32                                                     | RAB32    | 1  | 3  | 4  | 1.23 | 0.422 | 0.17 |
| IPI00014577 | Ras-related protein Rab-18                                                     | RAB18    | 4  | 2  | 4  | 1.04 | 0.666 | 0.44 |
| IPI00014938 | Nuclear protein Hcc-1                                                          | CIP29    | 3  | 2  | 2  | 0.89 | 0.734 | 0.37 |
| IPI00015102 | Isoform 1 of CD166 antigen precursor                                           | ALCAM    | 16 | 16 | 16 | 0.93 | 0.290 | 0.29 |
| IPI00015148 | Ras-related protein Rap-1b precursor                                           | RAP1B    | 2  | 0  | 2  | 1.27 | 0.465 | 0.16 |
| IPI00015262 | Calponin-2                                                                     | CNN2     | 11 | 5  | 9  | 1.02 | 0.063 | 0.31 |
| IPI00015602 | Mitochondrial precursor proteins import receptor                               | TOMM70A  | 3  | 4  | 3  | 0.94 | 0.377 | 0.35 |
| IPI00015688 | Glypican-1 precursor                                                           | GPC1     | 4  | 5  | 4  | 3.19 | 0.920 | 0.04 |
| IPI00015833 | Coiled-coil-helix-coiled-coil-helix domain-containing protein 3                | CHCHD3   | 8  | 13 | 8  | 0.70 | 0.245 | 0.04 |
| IPI00015947 | DnaJ homolog subfamily B member 1                                              | DNAJB1   | 2  | 3  | 2  | 0.96 | 0.913 | 0.47 |
| IPI00015973 | Band 4.1-like protein 2                                                        | EPB41L2  | 1  | 2  | 10 | 1.15 | 0.336 | 0.20 |
| IPI00016334 | Isoform 1of Cell surface glycoprotein MUC18 precursor                          | MCAM     | 8  | 12 | 19 | 0.86 | 0.073 | 0.02 |
| IPI00016339 | Ras-related protein Rab-5C                                                     | RAB5C    | 7  | 7  | 9  | 1.19 | 0.356 | 0.17 |
| IPI00016342 | Ras-related protein Rab-7a                                                     | RAB7A    | 3  | 6  | 8  | 1.22 | 0.658 | 0.27 |
| IPI00016405 | Isoform 1of OCIA domain-containing protein 1                                   | OCIAD1   | 1  | 3  | 4  | 0.88 | 0.651 | 0.34 |
| IPI00016610 | Poly(rC)-binding protein 1                                                     | PCBP1    | 2  | 4  | 7  | 1.20 | 0.430 | 0.20 |
| IPI00016621 | Adaptor-related protein complex 2. alpha 2 subunit variant (Fragment)          | AP2A2    | 5  | 1  | 4  | 0.93 | 0.522 | 0.38 |
| IPI00016670 | C11orf59 protein                                                               | C11orf59 | 6  | 2  | 6  | 2.20 | 0.571 | 0.04 |
| IPI00016801 | Glutamate dehydrogenase 1. mitochondrial precursor                             | GLUD1    | 2  | 1  | 2  | 1.23 | 0.954 | 0.32 |
| IPI00016915 | Insulin-like growth factor-binding protein 7 precursor                         | IGFBP7   | 9  | 8  | 7  | 1.97 | 0.157 | 0.00 |
| IPI00017292 | Isoform 1of Catenin beta-1                                                     | CTNNB1   | 9  | 9  | 9  | 0.82 | 0.268 | 0.10 |
| IPI00017334 | Prohibitin                                                                     | PHB      | 13 | 9  | 12 | 0.87 | 0.260 | 0.16 |
| IPI00017342 | Rho-related GTP-binding protein RhoG precursor                                 | RHOG     | 8  | 5  | 10 | 1.14 | 0.353 | 0.22 |
| IPI00017344 | Ras-related protein Rab-5B                                                     | RAB5B    | 2  | 3  | 3  | 1.19 | 0.264 | 0.12 |
| IPI00017367 | Radixin isoform b                                                              | RDX      | 3  | 9  | 7  | 0.87 | 1.060 | 0.38 |
| IPI00017510 | Cytochrome c oxidase subunit 2                                                 | MT-CO2   | 1  | 2  | 3  | 0.83 | 0.789 | 0.30 |
| IPI00017529 | Isoform 1 of Lymphocyte function-associated antigen 3 precursor                | CD58     |    |    |    | 0.82 | 0.043 | 0.00 |
| IPI00017567 | Isoform Long of Endoglin precursor                                             | ENG      | 3  | 1  | 3  | 1.28 | 0.449 | 0.15 |
| IPI00017596 | Microtubule-associated protein RP/EB family member 1                           | MAPRE1   | 2  | 4  | 2  | 1.28 | 0.466 | 0.16 |
| IPI00017617 | Probable ATP-dependent RNA helicase DDX5                                       | DDX5     | 3  | 3  | 4  | 0.76 | 0.475 | 0.14 |
| IPI00017726 | Isoform 1of 3-hydroxyacyl-CoA dehydrogenase type-2                             | HSD17B10 | 5  | 1  | 2  | 1.13 | 1.246 | 0.41 |
| IPI00017895 | Isoform 1of Glycerol-3-phosphate dehydrogenase. mitochondrial precursor        | GPD2     | 6  | 8  | 3  | 0.82 | 0.222 | 0.08 |
| IPI00018146 | 14-3-3 protein theta                                                           | YWHAQ    | 2  | 4  | 2  | 1.42 | 0.915 | 0.22 |

|             |                                                                 |           |     |     |     |      |       |      |
|-------------|-----------------------------------------------------------------|-----------|-----|-----|-----|------|-------|------|
| IPI00018219 | Transforming growth factor-beta-induced protein ig-h3 precursor | TGFBI     | 4   | 5   | 9   | 2.66 | 1.094 | 0.08 |
| IPI00018274 | Isoform 1 of Epidermal growth factor receptor precursor         | EGFR      | 9   | 11  | 16  | 0.97 | 0.437 | 0.45 |
| IPI00018415 | Transmembrane 9 superfamily member 2 precursor                  | TM9SF2    | 3   | 2   | 1   | 1.44 | 0.295 | 0.04 |
| IPI00018452 | Copine-1                                                        | CPNE1     | 2   | 4   | 8   | 2.02 | 1.385 | 0.17 |
| IPI00018871 | ADP-ribosylation factor-like protein 8B                         | ARL8B     | 2   | 2   | 2   | 1.91 | 0.344 | 0.02 |
| IPI00019146 | Isoform 1 of Coxsackievirus and adenovirus receptor precursor   | CXADR     | 8   | 2   | 7   | 1.13 | 0.380 | 0.25 |
| IPI00019157 | Chondroitin sulfate proteoglycan 4 precursor                    | CSPG4     | 3   | 13  | 12  | 1.47 | 0.849 | 0.19 |
| IPI00019376 | Septin-11                                                       | SEPT11    | 1   | 6   | 4   | 0.57 | 0.429 | 0.04 |
| IPI00019472 | Neutral amino acid transporter B                                | SLC1A5    | 8   | 6   | 9   | 0.91 | 0.499 | 0.34 |
| IPI00019502 | Myosin-9                                                        | MYH9      | 61  | 84  | 117 | 1.11 | 0.407 | 0.30 |
| IPI00019835 | Isoform 1 of Bcl-2-related proline-rich protein                 | BCL2L12   | 3   | 1   | 3   | 1.02 | 0.996 | 0.49 |
| IPI00019906 | Isoform 2 of Basigin precursor                                  | BSG       | 7   | 7   | 10  | 0.94 | 0.137 | 0.17 |
| IPI00019997 | Lin-7 homolog C                                                 | LIN7C     | 3   | 4   | 7   | 1.62 | 0.153 | 0.01 |
| IPI00020124 | Phosphatidylinositol 4-kinase type 2-alpha                      | PI4K2A    | 1   | 2   | 5   | 1.45 | 0.420 | 0.08 |
| IPI00020418 | Ras-related protein R-Ras precursor                             | RRAS      | 5   | 3   | 8   | 1.10 | 0.266 | 0.23 |
| IPI00020513 | Zyxin                                                           | ZYX       | 7   | 7   | 10  | 1.31 | 0.694 | 0.22 |
| IPI00020557 | Prolow-density lipoprotein receptor-related protein 1 precursor | LRP1      | 14  | 29  | 5   | 1.18 | 0.477 | 0.24 |
| IPI00020599 | Calreticulin precursor                                          | CALR      | 6   | 8   | 16  | 1.30 | 0.230 | 0.05 |
| IPI00020928 | Transcription factor A, mitochondrial precursor                 | TFAM      | 3   | 2   | 1   | 0.85 | 0.644 | 0.30 |
| IPI00020984 | Calnexin precursor                                              | CANX      | 6   | 8   | 10  | 1.49 | 0.164 | 0.01 |
| IPI00021033 | Isoform 1 of Collagen alpha-1(III) chain precursor              | COL3A1    | 4   | 6   | 6   | 2.32 | 0.325 | 0.01 |
| IPI00021048 | Isoform 1 of Myoferlin                                          | FER1L3    | 20  | 29  | 33  | 0.82 | 0.292 | 0.12 |
| IPI00021263 | 14-3-3 protein zeta/delta                                       | YWHAZ     | 3   | 9   | 10  | 1.16 | 0.616 | 0.30 |
| IPI00021266 | 60S ribosomal protein L23a                                      | RPL23A    | 4   | 3   | 7   | 0.80 | 0.180 | 0.05 |
| IPI00021405 | Isoform A of Lamin-A/C                                          | LMNA      | 5   | 9   | 11  | 1.33 | 0.202 | 0.04 |
| IPI00021440 | Actin, cytoplasmic 2                                            | ACTG1     | 26  | 16  | 28  | 1.16 | 0.473 | 0.26 |
| IPI00021812 | Neuroblast differentiation-associated protein AHNAK             | AHNAK     | 240 | 274 | 372 | 0.72 | 0.110 | 0.01 |
| IPI00021840 | 40S ribosomal protein S6                                        | RPS6      | 4   | 1   | 2   | 0.78 | 0.649 | 0.22 |
| IPI00021975 | Tumor necrosis factor receptor superfamily member 10A precursor | TNFRSF10A | 1   | 2   | 2   | 0.94 | 0.561 | 0.41 |
| IPI00021985 | Transmembrane 9 superfamily member 4                            | TM9SF4    | 6   | 4   | 2   | 1.59 | 0.185 | 0.01 |
| IPI00022048 | Prostaglandin F2 receptor negative regulator precursor          | PTGFRN    | 5   | 2   | 11  | 1.00 | 0.625 | 0.50 |
| IPI00022143 | Isoform 1 of Protein FAM62A                                     | FAM62A    | 4   | 8   | 12  | 1.19 | 0.121 | 0.03 |
| IPI00022202 | Isoform A of Phosphate carrier protein, mitochondrial precursor | SLC25A3   | 3   | 0   | 3   | 0.83 | 0.440 | 0.20 |
| IPI00022462 | Transferrin receptor protein 1                                  | TFRC      | 15  | 15  | 15  | 1.08 | 0.466 | 0.35 |
| IPI00022542 | Rho-associated protein kinase 1                                 | ROCK1     | 2   | 1   | 3   | 1.52 | 0.399 | 0.06 |

|             |                                                                                |          |    |    |    |      |       |      |
|-------------|--------------------------------------------------------------------------------|----------|----|----|----|------|-------|------|
| IPI00022558 | Isoform 1 of Myelin protein zero-like protein 1 precursor                      | MPZL1    | 1  | 2  | 3  | 1.07 | 0.078 | 0.08 |
| IPI00022649 | Isoform 1 of Solute carrier family 12 member 2                                 | SLC12A2  | 3  | 2  | 5  | 0.92 | 0.254 | 0.26 |
| IPI00022661 | Isoform Delta of Poliovirus receptor-related protein 2 precursor               | PVRL2    | 1  | 2  | 4  | 0.76 | 0.311 | 0.08 |
| IPI00022774 | Transitional endoplasmic reticulum ATPase                                      | VCP      | 10 | 18 | 7  | 1.26 | 0.485 | 0.18 |
| IPI00022793 | Trifunctional enzyme beta subunit. mitochondrial precursor                     | HADHB    | 4  | 5  | 3  | 0.78 | 0.531 | 0.18 |
| IPI00023048 | Elongation factor 1-delta                                                      | EEF1D    | 5  | 7  | 7  | 1.22 | 1.045 | 0.34 |
| IPI00023122 | Isoform 1 of PDZ and LIM domain protein 7                                      | PDLIM7   | 6  | 2  | 5  | 0.99 | 0.331 | 0.46 |
| IPI00023510 | Ras-related protein Rab-5A                                                     | RAB5A    | 4  | 3  | 4  | 1.19 | 0.427 | 0.21 |
| IPI00023542 | Transmembrane emp24 protein transport domain containing 9                      | TMED9    | 6  | 2  | 4  | 1.55 | 0.608 | 0.11 |
| IPI00023605 | Isoform 1 of Cdc42 effector protein 1                                          | CDC42EP1 | 4  | 1  | 3  | 0.97 | 0.311 | 0.42 |
| IPI00023704 | Lipoma-preferred partner                                                       | LPP      | 1  | 4  | 3  | 1.62 | 0.788 | 0.13 |
| IPI00024046 | Cadherin-13 precursor                                                          | CDH13    | 2  | 7  | 6  | 1.09 | 0.491 | 0.35 |
| IPI00024067 | Isoform 1 of Clathrin heavy chain 1                                            | CLTC     | 6  | 2  | 6  | 1.41 | 0.695 | 0.17 |
| IPI00024095 | Annexin A3                                                                     | ANXA3    | 13 | 14 | 9  | 1.71 | 1.508 | 0.23 |
| IPI00024145 | Voltage-dependent anion-selective channel protein 2                            | VDAC2    | 6  | 5  | 5  | 0.99 | 0.617 | 0.48 |
| IPI00024157 | FK506-binding protein 3                                                        | FKBP3    | 0  | 5  | 7  | 0.61 | 0.204 | 0.01 |
| IPI00024284 | Basement membrane-specific heparan sulfate proteoglycan core protein precursor | HSPG2    | 5  | 7  | 4  | 1.46 | 0.175 | 0.02 |
| IPI00024320 | Putative RNA-binding protein 3                                                 | RBM3     | 1  | 3  | 2  | 0.83 | 0.301 | 0.13 |
| IPI00024403 | Copine-3                                                                       | CPNE3    | 2  | 5  | 6  | 1.03 | 0.329 | 0.41 |
| IPI00024650 | Monocarboxylate transporter 1                                                  | SLC16A1  | 0  | 2  | 7  | 0.91 | 0.207 | 0.19 |
| IPI00024705 | PDZ domain-containing protein GIPC1                                            | GIPC1    | 3  | 2  | 4  | 1.39 | 0.330 | 0.06 |
| IPI00024911 | Endoplasmic reticulum protein ERp29 precursor                                  | ERP29    | 4  | 4  | 7  | 1.41 | 0.376 | 0.08 |
| IPI00024919 | Thioredoxin-dependent peroxide reductase. mitochondrial precursor              | PRDX3    | 2  | 1  | 3  | 0.76 | 1.057 | 0.29 |
| IPI00024920 | ATP synthase delta chain. mitochondrial precursor                              | ATP5D    | 3  | 4  | 2  | 0.84 | 0.290 | 0.14 |
| IPI00024933 | 60S ribosomal protein L12                                                      | RPL12    | 6  | 4  | 6  | 0.94 | 0.337 | 0.35 |
| IPI00024976 | Mitochondrial import receptor subunit TOM22 homolog                            | TOMM22   | 3  | 1  | 2  | 0.91 | 0.612 | 0.37 |
| IPI00025091 | 40S ribosomal protein S11                                                      | RPS11    | 2  | 4  | 3  | 0.77 | 0.262 | 0.06 |
| IPI00025156 | Isoform 1 of STIP1 homology and U box-containing protein 1                     | STUB1    | 2  | 3  | 6  | 1.05 | 0.097 | 0.16 |
| IPI00025252 | Protein disulfide-isomerase A3 precursor                                       | PDIA3    | 24 | 15 | 30 | 1.43 | 0.176 | 0.02 |
| IPI00025277 | Programmed cell death protein 6                                                | PDCD6    | 5  | 2  | 6  | 1.35 | 0.707 | 0.20 |
| IPI00025329 | 60S ribosomal protein L19                                                      | RPL19    | 7  | 6  | 6  | 0.97 | 0.418 | 0.44 |
| IPI00025491 | Eukaryotic initiation factor 4A-I                                              | EIF4A1   | 3  | 3  | 4  | 1.19 | 0.598 | 0.27 |
| IPI00025512 | Heat shock protein beta-1                                                      | HSPB1    | 6  | 4  | 7  | 1.26 | 0.746 | 0.26 |
| IPI00025717 | Metaxin-2                                                                      | MTX2     | 2  | 2  | 1  | 0.91 | 0.659 | 0.37 |
| IPI00025796 | NADH dehydrogenase [ubiquinone] iron-sulfur protein 3. mitochondrial precursor | NDUFS3   | 2  | 3  | 3  | 1.08 | 0.741 | 0.41 |



|             |                                                                                                                                                             |          |    |    |    |      |       |      |
|-------------|-------------------------------------------------------------------------------------------------------------------------------------------------------------|----------|----|----|----|------|-------|------|
| IPI00025809 | Alpha-1.6-mannosyl-glycoprotein 2-beta-N-acetylglucosaminyltransferase                                                                                      | MGAT2    | 3  | 3  | 2  | 1.13 | 0.418 | 0.27 |
| IPI00025818 | Isoform 1 of Polypeptide N-acetylgalactosaminyltransferase 1                                                                                                | GALNT1   | 6  | 12 | 10 | 1.01 | 0.233 | 0.48 |
| IPI00025849 | Acidic leucine-rich nuclear phosphoprotein 32 family member A<br>Dolichyl-diphosphooligosaccharide--protein glycosyltransferase 67 kDa subunit<br>precursor | ANP32A   | 2  | 1  | 2  | 1.18 | 0.166 | 0.07 |
| IPI00025874 | Charged multivesicular body protein 4b                                                                                                                      | RPN1     | 8  | 9  | 12 | 1.30 | 0.150 | 0.02 |
| IPI00025974 | Glucosidase 2 subunit beta precursor                                                                                                                        | CHMP4B   | 3  | 5  | 8  | 1.27 | 0.375 | 0.13 |
| IPI00026154 | Bone marrow stromal antigen 2 precursor                                                                                                                     | PRKCSH   | 5  | 11 | 11 | 1.20 | 0.109 | 0.03 |
| IPI00026241 | Guanine nucleotide-binding protein G(I)/G(S)/G(T) subunit beta-1                                                                                            | BST2     | 5  | 2  | 4  | 1.03 | 0.086 | 0.22 |
| IPI00026268 | 40S ribosomal protein S14                                                                                                                                   | GNB1     | 3  | 3  | 4  | 1.00 | 0.351 | 0.50 |
| IPI00026271 | Succinyl-CoA:3-ketoacid-coenzyme A transferase 1. mitochondrial precursor                                                                                   | RPS14    | 5  | 3  | 4  | 0.68 | 0.536 | 0.11 |
| IPI00026516 | Protein ERGIC-53 precursor                                                                                                                                  | OXCT1    | 4  | 3  | 1  | 0.88 | 1.575 | 0.43 |
| IPI00026530 | Putative uncharacterized protein DKFZp686L20222                                                                                                             | LMAN1    | 6  | 5  | 9  | 1.35 | 0.470 | 0.12 |
| IPI00026689 | Heme oxygenase 2                                                                                                                                            | CDC2     | 3  | 2  | 2  | 1.33 | 0.517 | 0.15 |
| IPI00026824 | Alpha-2-macroglobulin receptor-associated protein precursor                                                                                                 | HMOX2    | 2  | 4  | 5  | 1.24 | 0.568 | 0.22 |
| IPI00026848 | Isoform 1 of Neural cell adhesion molecule L1 precursor                                                                                                     | LRPAP1   | 3  | 3  | 4  | 1.26 | 0.194 | 0.05 |
| IPI00027087 | Tu translation elongation factor. mitochondrial                                                                                                             | L1CAM    | 0  | 1  | 4  | 0.70 | 0.118 | 0.01 |
| IPI00027107 | Sorcin                                                                                                                                                      | TUFM     | 2  | 0  | 4  | 1.04 | 1.269 | 0.47 |
| IPI00027175 | Endoplasmic precursor                                                                                                                                       | SRI      | 3  | 1  | 4  | 1.05 | 1.342 | 0.47 |
| IPI00027230 | Insulin-like growth factor 1receptor precursor                                                                                                              | HSP90B1  | 17 | 20 | 20 | 1.16 | 0.119 | 0.04 |
| IPI00027232 | Prohibitin-2                                                                                                                                                | IGF1R    | 4  | 6  | 5  | 0.86 | 0.417 | 0.23 |
| IPI00027252 | 60S ribosomal protein L26                                                                                                                                   | PHB2     | 11 | 8  | 10 | 0.88 | 0.183 | 0.11 |
| IPI00027270 | Peroxisome oxidoreductin-2                                                                                                                                  | RPL26    | 1  | 2  | 2  | 0.73 | 0.467 | 0.12 |
| IPI00027350 | Isoform 1 of Hematological and neurological expressed 1-like protein                                                                                        | PRDX2    | 3  | 0  | 5  | 1.60 | 0.594 | 0.09 |
| IPI00027397 | Isoform Beta-4C of Integrin beta-4 precursor                                                                                                                | HN1L     | 3  | 1  | 6  | 1.25 | 0.568 | 0.21 |
| IPI00027422 | Flotillin-1                                                                                                                                                 | ITGB4    | 9  | 11 | 12 | 0.98 | 0.210 | 0.40 |
| IPI00027438 | 4F2 cell-surface antigen heavy chain                                                                                                                        | FLOT1    | 14 | 14 | 17 | 1.39 | 0.025 | 0.00 |
| IPI00027493 | Glucose-6-phosphate isomerase                                                                                                                               | SLC3A2   | 19 | 16 | 19 | 0.82 | 0.149 | 0.04 |
| IPI00027497 | Isoform 1 of Integrin alpha-V precursor                                                                                                                     | GPI      | 4  | 2  | 1  | 1.28 | 0.600 | 0.21 |
| IPI00027505 | T-complex protein 1 subunit zeta                                                                                                                            | ITGAV    |    |    |    | 0.99 | 0.142 | 0.46 |
| IPI00027626 | Beta-hexosaminidase alpha chain precursor                                                                                                                   | CCT6A    | 4  | 4  | 2  | 2.18 | 0.723 | 0.06 |
| IPI00027851 | Isoform 1 of Very long-chain specific acyl-CoA dehydrogenase. mitochondrial<br>precursor                                                                    | HEXA     | 2  | 1  | 4  | 1.40 | 0.765 | 0.19 |
| IPI00028031 | Transmembrane emp24 domain-containing protein 10 precursor                                                                                                  | ACADVL   | 4  | 2  | 0  | 0.79 | 0.669 | 0.24 |
| IPI00028055 | Actin-related protein 3                                                                                                                                     | TMED10   | 6  | 4  | 7  | 1.50 | 0.433 | 0.07 |
| IPI00028091 | Isoform 1 of Protein lunapark                                                                                                                               | ACTR3    | 6  | 5  | 8  | 0.93 | 0.210 | 0.24 |
| IPI00028369 |                                                                                                                                                             | KIAA1715 | 2  | 1  | 3  | 1.54 | 0.283 | 0.03 |

|             |                                                                                  |             |    |    |    |      |       |      |
|-------------|----------------------------------------------------------------------------------|-------------|----|----|----|------|-------|------|
| IPI00028481 | Ras-related protein Rab-8A                                                       | RAB8A       | 2  | 3  | 7  | 1.19 | 0.438 | 0.21 |
| IPI00028888 | Isoform 1 of Heterogeneous nuclear ribonucleoprotein D0                          | HNRPD       | 2  | 4  | 2  | 0.93 | 0.574 | 0.39 |
| IPI00028911 | Dystroglycan precursor                                                           | DAG1        | 2  | 2  | 2  | 0.98 | 0.458 | 0.46 |
| IPI00028931 | Desmoglein-2 precursor                                                           | DSG2        | 17 | 17 | 23 | 1.08 | 0.099 | 0.10 |
| IPI00029111 | DPYSL3 protein                                                                   | DPYSL3      | 2  | 5  | 3  | 0.99 | 0.891 | 0.49 |
| IPI00029133 | ATP synthase B chain. mitochondrial precursor                                    | ATP5F1      | 3  | 6  | 4  | 0.79 | 0.218 | 0.06 |
| IPI00029264 | Cytochrome c1. heme protein. mitochondrial precursor                             | CYC1        | 2  | 1  | 2  | 0.91 | 0.286 | 0.24 |
| IPI00029601 | Src substrate cortactin                                                          | CTTN        | 9  | 9  | 8  | 1.10 | 0.394 | 0.30 |
| IPI00029730 | Syntaxin-4                                                                       | STX4        | 5  | 3  | 8  | 1.02 | 0.136 | 0.39 |
| IPI00029737 | Isoform Long of Long-chain-fatty-acid--CoA ligase 4                              | ACSL4       | 2  | 3  | 2  | 1.46 | 0.162 | 0.01 |
| IPI00030131 | Isoform Beta of Lamina-associated polypeptide 2. isoforms beta/gamma             | TMPO        | 5  | 4  | 4  | 1.31 | 0.242 | 0.05 |
| IPI00030351 | Isoform 1 of Disks large homolog 1                                               | DLG1        | 2  | 3  | 2  | 1.84 | 0.231 | 0.01 |
| IPI00031169 | Ras-related protein Rab-2A                                                       | RAB2A       | 3  | 3  | 4  | 1.49 | 0.708 | 0.15 |
| IPI00031522 | Trifunctional enzyme subunit alpha. mitochondrial precursor                      | HADHA       | 3  | 8  | 1  | 0.74 | 0.447 | 0.12 |
| IPI00031697 | Transmembrane protein 109 precursor                                              | TMEM109     | 2  | 2  | 4  | 1.32 | 0.492 | 0.15 |
| IPI00031804 | Isoform 1 of Voltage-dependent anion-selective channel protein 3                 | VDAC3       | 5  | 3  | 4  | 1.00 | 0.439 | 0.50 |
| IPI00031812 | Nuclease sensitive element-binding protein 1                                     | YBX1        | 5  | 5  | 9  | 0.76 | 0.357 | 0.10 |
| IPI00031820 | Phenylalanyl-tRNA synthetase alpha chain                                         | FARSA       | 2  | 1  | 2  | 0.77 | 0.113 | 0.01 |
| IPI00031836 | Developmentally-regulated GTP-binding protein 1                                  | DRG1        | 2  | 3  | 1  | 0.72 | 0.061 | 0.00 |
| IPI00032003 | Emerin                                                                           | EMD         | 7  | 4  | 6  | 1.23 | 0.320 | 0.12 |
| IPI00032064 | PALM2-AKAP2 protein isoform 1                                                    | PALM2-AKAP2 | 3  | 7  | 11 | 0.85 | 0.544 | 0.26 |
| IPI00032140 | Serpin H1 precursor                                                              | SERPINH1    | 10 | 8  | 16 | 0.80 | 0.490 | 0.18 |
| IPI00032831 | Synaptosomal-associated protein 29                                               | SNAP29      | 2  | 2  | 9  | 2.08 | 0.430 | 0.03 |
| IPI00033025 | Isoform 1 of Septin-7                                                            | SEPT7       | 3  | 6  | 16 | 0.57 | 0.200 | 0.01 |
| IPI00033494 | Myosin regulatory light chain                                                    | MRLC2       | 7  | 5  | 9  | 1.15 | 0.372 | 0.23 |
| IPI00044683 | Isoform 1 of Amyotrophic lateral sclerosis 2 chromosomal region candidate gene 4 | ALS2CR4     | 2  | 4  | 4  | 0.92 | 0.603 | 0.38 |
| IPI00046057 | Isoform 2 of Syntaxin-binding protein 1                                          | STXBP1      | 3  | 2  | 2  | 0.64 | 0.172 | 0.01 |
| IPI00056334 | Protein kinase C. delta binding protein                                          | PRKCDBP     | 5  | 4  | 5  | 1.33 | 1.527 | 0.34 |
| IPI00059472 | Vesicle transport through interaction with t-SNAREs homolog 1A                   | VTI1A       | 2  | 2  | 1  | 1.16 | 0.165 | 0.08 |
| IPI00060627 | Coiled-coil domain-containing protein 124                                        | CCDC124     | 2  | 2  | 7  | 1.04 | 0.801 | 0.46 |
| IPI00060715 | BTB/POZ domain-containing protein KCTD12                                         | KCTD12      | 2  | 3  | 4  | 1.17 | 0.978 | 0.36 |
| IPI00072377 | Isoform 1 of Protein SET                                                         | SET         | 1  | 2  | 4  | 0.97 | 0.622 | 0.46 |
| IPI00075248 | Calmodulin                                                                       | CALM2       | 1  | 4  | 4  | 1.28 | 0.751 | 0.25 |
| IPI00100199 | Cytochrome b reductase 1                                                         | CYBRD1      | 2  | 2  | 3  | 1.00 | 0.307 | 0.50 |
| IPI00100796 | Charged multivesicular body protein 5                                            | CHMP5       | 1  | 4  | 2  | 1.61 | 0.227 | 0.02 |

|             |                                                                             |                       |    |    |    |      |       |      |
|-------------|-----------------------------------------------------------------------------|-----------------------|----|----|----|------|-------|------|
| IPI00100980 | EH domain-containing protein 2                                              | EHD2                  | 5  | 3  | 3  | 1.73 | 0.367 | 0.03 |
| IPI00101374 | Transmembrane 9 superfamily member 1 precursor                              | TM9SF1                | 4  | 2  | 2  | 1.44 | 0.386 | 0.07 |
| IPI00101952 | Isoform 1of Solute carrier family 35 member E1                              | SLC35E1               | 1  | 2  | 2  | 1.40 | 0.491 | 0.11 |
| IPI00102685 | Myeloid-associated differentiation marker                                   | MYADM                 | 2  | 2  | 2  | 0.77 | 0.261 | 0.06 |
| IPI00103175 | Isoform 1 of Soluble calcium-activated nucleotidase 1                       | CANT1                 | 1  | 5  | 3  | 1.47 | 0.720 | 0.16 |
| IPI00106646 | 45 kDa calcium-binding protein precursor                                    | SDF4                  | 6  | 7  | 13 | 1.67 | 0.365 | 0.04 |
| IPI00107831 | Receptor-type tyrosine-protein phosphatase F precursor+E274                 | PTPRF                 | 8  | 10 | 28 | 1.29 | 0.261 | 0.07 |
| IPI00140420 | Staphylococcal nuclease domain-containing protein 1                         | SND1                  | 2  | 5  | 6  | 0.76 | 0.074 | 0.01 |
| IPI00141318 | Isoform 1of Cytoskeleton-associated protein 4                               | CKAP4                 | 7  | 16 | 24 | 1.06 | 0.377 | 0.36 |
| IPI00152418 | Decay-accelerating factor splicing variant 4                                | CD55                  | 1  | 2  | 2  | 0.87 | 0.435 | 0.25 |
| IPI00152540 | Isoform 1of CD109 antigen precursor                                         | CD109                 | 6  | 8  | 13 | 1.21 | 0.135 | 0.04 |
| IPI00152642 | Leucine-rich repeat-containing protein 8C                                   | LRRC8C                | 1  | 2  | 2  | 0.79 | 0.828 | 0.28 |
| IPI00152853 | Isoform 1of Phostensin                                                      | KIAA1949              | 5  | 5  | 14 | 0.73 | 0.788 | 0.21 |
| IPI00156689 | Synaptic vesicle membrane protein VAT-1 homolog                             | VAT1                  | 3  | 2  | 3  | 1.78 | 0.512 | 0.05 |
| IPI00163187 | Fascin                                                                      | FSCN1                 | 5  | 5  | 10 | 1.16 | 1.563 | 0.42 |
| IPI00165393 | Acidic leucine-rich nuclear phosphoprotein 32 family member E               | ANP32E                | 1  | 2  | 2  | 1.57 | 1.476 | 0.26 |
| IPI00168262 | Glycosyltransferase 25 family member 1 precursor                            | GLT25D1               | 2  | 3  | 2  | 0.88 | 0.279 | 0.18 |
| IPI00169383 | Phosphoglycerate kinase 1                                                   | PGK1                  | 3  | 3  | 8  | 1.16 | 0.590 | 0.29 |
| IPI00170692 | Vesicle-associated membrane protein-associated protein A                    | VAPA                  | 3  | 4  | 6  | 1.29 | 0.272 | 0.07 |
| IPI00171411 | Golgi phosphoprotein 2                                                      | GOLM1                 | 3  | 3  | 3  | 3.09 | 0.425 | 0.01 |
| IPI00171412 | Isoform 1of Sulfatase-modifying factor 2 precursor                          | SUMF2                 | 9  | 4  | 5  | 1.24 | 0.138 | 0.03 |
| IPI00171438 | Thioredoxin domain-containing protein 5 precursor                           | TXNDC5                | 1  | 2  | 8  | 1.12 | 0.103 | 0.05 |
| IPI00171614 | Monocarboxylate transporter 2                                               | SLC16A7               | 1  | 2  | 2  | 1.11 | 0.323 | 0.25 |
| IPI00171626 | 1-acylglycerophosphocholine O-acyltransferase 1                             | AYTL2                 | 2  | 4  | 2  | 1.34 | 0.161 | 0.02 |
| IPI00171903 | Isoform 1 of Heterogeneous nuclear ribonucleoprotein M                      | HNRPM                 | 5  | 9  | 4  | 1.13 | 0.492 | 0.30 |
| IPI00172656 | UBX domain-containing protein 8                                             | UBXD8                 | 2  | 2  | 2  | 1.03 | 0.279 | 0.42 |
| IPI00176221 | Neuronal growth regulator 1precursor                                        | NEGR1                 | 4  | 4  | 8  | 1.12 | 0.313 | 0.23 |
| IPI00176903 | Isoform 1 of Polymerase I and transcript release factor                     | PTRF                  | 5  | 3  | 7  | 1.34 | 1.171 | 0.30 |
| IPI00178440 | Elongation factor 1-beta                                                    | EEF1B2                | 3  | 2  | 2  | 1.07 | 0.973 | 0.44 |
| IPI00179326 | Brain-specific angiogenesis inhibitor 1-associated protein 2-like protein 1 | BAIAP2L1              | 2  | 3  | 6  | 1.69 | 0.528 | 0.07 |
| IPI00179330 | Ubiquitin and ribosomal protein S27a precursor                              | UBB                   | 6  | 5  | 3  | 0.90 | 1.111 | 0.42 |
| IPI00180292 | Isoform 5 of Brain-specific angiogenesis inhibitor 1-associated protein 2   | BAIAP2                | 1  | 3  | 3  | 0.88 | 0.132 | 0.07 |
| IPI00186290 | Elongation factor 2                                                         | EEF2                  | 12 | 11 | 6  | 0.98 | 0.352 | 0.45 |
| IPI00186712 | OTTHUMP00000018641                                                          | OTTHUMPO<br>000018641 | 2  | 2  | 1  | 0.74 | 0.476 | 0.13 |
| IPI00215613 | Integrin alpha-11precursor                                                  | ITGA11                | 9  | 9  | 12 | 0.79 | 1.030 | 0.31 |

|             |                                                                     |          |    |    |    |      |       |      |
|-------------|---------------------------------------------------------------------|----------|----|----|----|------|-------|------|
| IPI00215637 | ATP-dependent RNA helicase DDX3X                                    | DDX3X    | 3  | 4  | 2  | 0.72 | 0.454 | 0.10 |
| IPI00215719 | 60S ribosomal protein L18                                           | RPL18    | 5  | 3  | 3  | 0.76 | 0.193 | 0.03 |
| IPI00215767 | Isoform Long of Beta-1.4-galactosyltransferase 1                    | B4GALT1  | 4  | 2  | 3  | 1.79 | 0.315 | 0.02 |
| IPI00215780 | 40S ribosomal protein S19                                           | RPS19    | 6  | 8  | 8  | 0.82 | 0.191 | 0.06 |
| IPI00215893 | Heme oxygenase 1                                                    | HMOX1    | 4  | 2  | 4  | 0.93 | 0.872 | 0.43 |
| IPI00215901 | Isoform 1 of Adenylate kinase isoenzyme 2. mitochondrial            | AK2      | 5  | 4  | 7  | 1.01 | 0.759 | 0.49 |
| IPI00215948 | Isoform 1 of Catenin alpha-1                                        | CTNNA1   | 32 | 39 | 32 | 0.90 | 0.263 | 0.22 |
| IPI00215965 | Isoform A1-B of Heterogeneous nuclear ribonucleoprotein A1          | HNRNPA1  | 3  | 2  | 2  | 0.97 | 0.374 | 0.44 |
| IPI00215995 | Isoform Alpha-3A of Integrin alpha-3 precursor                      | ITGA3    | 7  | 7  | 11 | 1.02 | 0.135 | 0.38 |
| IPI00216049 | Isoform 1 of Heterogeneous nuclear ribonucleoprotein K              | HNRPK    | 9  | 6  | 5  | 0.93 | 0.290 | 0.30 |
| IPI00216184 | Isoform 2 of Phosphatidylinositol-binding clathrin assembly protein | PICALM   | 1  | 2  | 2  | 0.92 | 0.170 | 0.18 |
| IPI00216308 | Voltage-dependent anion-selective channel protein 1                 | VDAC1    | 12 | 11 | 8  | 1.06 | 0.381 | 0.38 |
| IPI00216393 | Isoform Non-brain of Clathrin light chain A                         | CLTA     | 2  | 3  | 5  | 1.57 | 0.621 | 0.11 |
| IPI00216546 | Isoform 2 of Probable palmitoyltransferase ZDHHC5                   | ZDHHC5   | 6  | 5  | 7  | 1.25 | 0.553 | 0.21 |
| IPI00216587 | 40S ribosomal protein S8                                            | RPS8     | 7  | 2  | 4  | 0.73 | 0.330 | 0.07 |
| IPI00216592 | Isoform C1 of Heterogeneous nuclear ribonucleoproteins C1/C2        | HNRNPC   | 3  | 3  | 5  | 1.09 | 0.105 | 0.10 |
| IPI00216682 | Calponin-3                                                          | CNN3     | 8  | 6  | 9  | 0.87 | 0.407 | 0.25 |
| IPI00216694 | Plastin 3                                                           | PLS3     | 21 | 14 | 18 | 1.22 | 1.444 | 0.38 |
| IPI00217030 | 40S ribosomal protein S4. X isoform                                 | RPS4X    | 5  | 2  | 3  | 0.68 | 0.726 | 0.16 |
| IPI00217121 | Uncharacterized protein C19orf21                                    | C19orf21 | 12 | 13 | 20 | 0.75 | 0.146 | 0.02 |
| IPI00217465 | Histone H1.2                                                        | HIST1H1C | 4  | 7  | 8  | 1.19 | 0.224 | 0.09 |
| IPI00217468 | Histone H1.5                                                        | HIST1H1B | 3  | 5  | 7  | 1.21 | 0.319 | 0.14 |
| IPI00217519 | Ras-related protein Ral-A precursor                                 | RALA     | 8  | 6  | 8  | 1.01 | 0.236 | 0.46 |
| IPI00217966 | Isoform 1 of L-lactate dehydrogenase A chain                        | LDHA     | 7  | 5  | 9  | 1.14 | 0.558 | 0.31 |
| IPI00217975 | Lamin-B1                                                            | LMNB1    | 1  | 9  | 6  | 1.38 | 0.279 | 0.05 |
| IPI00218200 | B-cell receptor-associated protein 31                               | BCAP31   | 3  | 12 | 13 | 1.30 | 0.164 | 0.03 |
| IPI00218236 | Serine/threonine-protein phosphatase PP1-beta catalytic subunit     | PPP1CB   | 2  | 1  | 2  | 1.03 | 0.663 | 0.46 |
| IPI00218342 | C-1-tetrahydrofolate synthase. cytoplasmic                          | MTHFD1   | 7  | 9  | 5  | 0.94 | 0.531 | 0.39 |
| IPI00218696 | Isoform 4 of Caldesmon                                              | CALD1    | 9  | 24 | 16 | 0.69 | 0.143 | 0.01 |
| IPI00218782 | Capping protein                                                     | CAPZB    | 4  | 2  | 10 | 1.01 | 0.492 | 0.48 |
| IPI00218918 | Annexin A1                                                          | ANXA1    | 21 | 18 | 25 | 1.68 | 0.954 | 0.15 |
| IPI00219018 | Glyceraldehyde-3-phosphate dehydrogenase                            | GAPDH    | 12 | 7  | 10 | 1.67 | 0.480 | 0.06 |
| IPI00219217 | L-lactate dehydrogenase B chain                                     | LDHB     | 4  | 4  | 8  | 1.01 | 0.605 | 0.48 |
| IPI00219344 | Hippocalcin-like protein 1                                          | HPCAL1   | 5  | 2  | 8  | 1.21 | 0.276 | 0.11 |
| IPI00219425 | Isoform Beta of Poliovirus receptor precursor                       | PVR      | 3  | 6  | 7  | 1.14 | 0.767 | 0.36 |

|             |                                                                                   |        |    |    |    |      |       |      |
|-------------|-----------------------------------------------------------------------------------|--------|----|----|----|------|-------|------|
| IPI00219678 | Eukaryotic translation initiation factor 2 subunit 1                              | EIF2S1 | 1  | 3  | 3  | 1.13 | 0.475 | 0.29 |
| IPI00219682 | Erythrocyte band 7 integral membrane protein                                      | STOM   | 13 | 7  | 9  | 1.45 | 0.533 | 0.11 |
| IPI00219868 | Isoform 1AC of Catenin delta-1                                                    | CTNND1 | 28 | 27 | 39 | 0.83 | 0.183 | 0.06 |
| IPI00220099 | Isoform B of Syntaxin-3                                                           | STX3   | 0  | 4  | 5  | 0.88 | 0.384 | 0.25 |
| IPI00220194 | Solute carrier family 2. facilitated glucose transporter member 1                 | SLC2A1 | 5  | 6  | 7  | 0.66 | 0.096 | 0.00 |
| IPI00220278 | Myosin regulatory light chain 2. smooth muscle isoform                            | MYL9   | 3  | 2  | 2  | 1.04 | 0.471 | 0.42 |
| IPI00220487 | Isoform 1 of ATP synthase D chain. mitochondrial                                  | ATP5H  | 9  | 2  | 10 | 0.83 | 0.166 | 0.05 |
| IPI00220556 | Isoform 3 of Pre-B-cell leukemia transcription factor-interacting protein 1       | PBXIP1 | 1  | 4  | 4  | 1.62 | 0.277 | 0.02 |
| IPI00220578 | Guanine nucleotide-binding protein G                                              | GNAI3  | 4  | 2  | 7  | 1.00 | 0.328 | 0.49 |
| IPI00220642 | 14-3-3 protein gamma                                                              | YWHAG  | 1  | 4  | 4  | 1.20 | 0.696 | 0.29 |
| IPI00220739 | Membrane-associated progesterone receptor component 1                             | PGRMC1 | 4  | 4  | 10 | 1.28 | 0.370 | 0.12 |
| IPI00220993 | Isoform CNPI of 2'.3'-cyclic-nucleotide 3'-phosphodiesterase                      | CNP    |    |    |    | 1.09 | 0.569 | 0.37 |
| IPI00221089 | 40S ribosomal protein S13                                                         | RPS13  | 5  | 2  | 3  | 0.65 | 0.477 | 0.07 |
| IPI00221224 | Aminopeptidase N                                                                  | ANPEP  | 5  | 6  | 15 | 1.31 | 0.276 | 0.07 |
| IPI00221354 | Isoform Short of RNA-binding protein FUS                                          | FUS    | 2  | 5  | 6  | 0.68 | 0.654 | 0.14 |
| IPI00238262 | Amphoterin-induced protein 2 precursor                                            | AMIGO2 | 3  | 4  | 3  | 0.88 | 1.020 | 0.39 |
| IPI00253036 | Isoform I of CD99 antigen precursor                                               | CD99   | 3  | 3  | 4  | 1.04 | 0.279 | 0.39 |
| IPI00257508 | Dihydropyrimidinase-related protein 2                                             | DPYSL2 | 2  | 2  | 1  | 1.25 | 0.852 | 0.29 |
| IPI00289334 | Isoform 1 of Filamin-B                                                            | FLNB   | 82 | 71 | 59 | 0.70 | 0.339 | 0.06 |
| IPI00289819 | Cation-independent mannose-6-phosphate receptor precursor                         | IGF2R  | 3  | 2  | 8  | 1.10 | 0.382 | 0.30 |
| IPI00289876 | Isoform 1 of Syntaxin-7                                                           | STX7   | 3  | 4  | 4  | 1.36 | 0.641 | 0.18 |
| IPI00290085 | Cadherin-2 precursor                                                              | CDH2   | 9  | 13 | 18 | 1.00 | 0.146 | 0.49 |
| IPI00290328 | Receptor-type tyrosine-protein phosphatase eta precursor                          | PTPRJ  | 3  | 8  | 7  | 1.05 | 0.143 | 0.25 |
| IPI00290566 | T-complex protein 1 subunit alpha                                                 | TCP1   | 2  | 7  | 4  | 2.44 | 0.699 | 0.04 |
| IPI00290770 | Chaperonin containing TCP1. subunit 3 isoform b                                   | CCT3   | 3  | 7  | 5  | 2.18 | 0.484 | 0.03 |
| IPI00290928 | Guanine nucleotide-binding protein alpha-13 subunit                               | GNAI3  | 3  | 4  | 4  | 0.90 | 0.315 | 0.25 |
| IPI00291006 | Malate dehydrogenase. mitochondrial precursor                                     | MDH2   | 6  | 8  | 9  | 1.09 | 1.455 | 0.45 |
| IPI00291175 | Isoform 1 of Vinculin                                                             | VCL    | 6  | 19 | 3  | 0.89 | 0.571 | 0.33 |
| IPI00291262 | Clusterin precursor                                                               | CLU    | 5  | 1  | 2  | 2.57 | 0.490 | 0.02 |
| IPI00291328 | NADH dehydrogenase [ubiquinone] flavoprotein 2. mitochondrial precursor           | NDUFV2 | 2  | 2  | 1  | 1.51 | 1.230 | 0.24 |
| IPI00291802 | Isoform 3 of LIM domain only protein 7                                            | LMO7   | 1  | 7  | 14 | 0.99 | 0.617 | 0.48 |
| IPI00291928 | Ras-related protein Rab-14                                                        | RAB14  | 8  | 5  | 10 | 1.23 | 0.588 | 0.24 |
| IPI00293402 | Uncharacterized protein STX10                                                     | STX10  | 3  | 4  | 2  | 1.08 | 0.329 | 0.32 |
| IPI00293434 | Signal recognition particle 14 kDa protein                                        | SRP14  | 5  | 1  | 4  | 1.28 | 0.643 | 0.22 |
| IPI00294911 | Succinate dehydrogenase [ubiquinone] iron-sulfur subunit. mitochondrial precursor | SDHB   | 3  | 2  | 2  | 0.89 | 0.225 | 0.17 |

|             |                                                                                    |          |     |    |     |      |       |      |
|-------------|------------------------------------------------------------------------------------|----------|-----|----|-----|------|-------|------|
| IPI00295542 | Nucleobindin-1precursor                                                            | NUCB1    | 16  | 21 | 32  | 1.84 | 0.238 | 0.01 |
| IPI00295992 | Isoform 2 of ATPase family AAA domain-containing protein 3A                        | ATAD3A   | 9   | 16 | 14  | 0.72 | 0.294 | 0.05 |
| IPI00296099 | Thrombospondin-1precursor                                                          | THBS1    | 6   | 9  | 14  | 0.60 | 1.159 | 0.19 |
| IPI00296421 | EH domain-binding protein 1-like protein 1                                         | EHBP1L1  | 2   | 1  | 6   | 1.90 | 0.501 | 0.04 |
| IPI00296992 | AXL receptor tyrosine kinase isoform 1                                             | AXL      | 2   | 2  | 4   | 1.21 | 0.563 | 0.25 |
| IPI00297084 | Dolichyl-diphosphooligosaccharide-protein glycosyltransferase precursor            | DDOST    | 4   | 2  | 3   | 1.29 | 0.224 | 0.05 |
| IPI00297160 | Isoform 12 of CD44 antigen precursor                                               | CD44     | 9   | 9  | 13  | 0.84 | 0.626 | 0.28 |
| IPI00297626 | Syntaxin-binding protein 3                                                         | STXBP3   | 4   | 3  | 5   | 0.87 | 0.233 | 0.14 |
| IPI00297646 | Collagen alpha-1(I) chain precursor                                                | COL1A1   | 2   | 9  | 8   | 1.47 | 0.641 | 0.14 |
| IPI00297655 | Neurogenic locus notch homolog protein 2 precursor                                 | NOTCH2   | 4   | 12 | 11  | 0.83 | 0.356 | 0.16 |
| IPI00297779 | T-complex protein 1 subunit beta                                                   | CCT2     | 3   | 5  | 3   | 2.20 | 0.804 | 0.07 |
| IPI00297910 | Tumor-associated calcium signal transducer 2 precursor                             | TACSTD2  | 3   | 3  | 5   | 0.85 | 0.099 | 0.03 |
| IPI00298057 | Periplakin                                                                         | PPL      | 13  | 17 | 11  | 0.74 | 0.607 | 0.17 |
| IPI00298237 | Isoform 1 of Tripeptidyl-peptidase 1 precursor                                     | TPP1     | 3   | 0  | 3   | 1.55 | 0.284 | 0.03 |
| IPI00298347 | Isoform 2 of Tyrosine-protein phosphatase non-receptor type 11                     | PTPN11   | 1   | 2  | 2   | 0.82 | 0.204 | 0.07 |
| IPI00298994 | Uncharacterized protein TLN1                                                       | TLN1     | 36  | 29 | 29  | 1.84 | 0.598 | 0.06 |
| IPI00299024 | Brain acid soluble protein 1                                                       | BASP1    | 6   | 18 | 17  | 1.35 | 0.624 | 0.18 |
| IPI00299116 | Podocalyxin-like protein 1precursor                                                | PODXL    | 1   | 5  | 4   | 0.85 | 0.583 | 0.28 |
| IPI00299412 | Isoform 2 of CD97 antigen precursor                                                | CD97     | 6   | 8  | 10  | 0.90 | 0.542 | 0.34 |
| IPI00299571 | Isoform 2 of Protein disulfide-isomerase A6 precursor                              | PDIA6    | 5   | 6  | 9   | 1.11 | 0.307 | 0.24 |
| IPI00299573 | 60S ribosomal protein L7a                                                          | RPL7A    | 9   | 2  | 4   | 0.77 | 0.316 | 0.09 |
| IPI00301058 | Vasodilator-stimulated phosphoprotein                                              | VASP     | 8   | 15 | 17  | 0.84 | 0.341 | 0.16 |
| IPI00302592 | Filamin A. alpha isoform 1                                                         | FLNA     | 130 | 86 | 109 | 0.72 | 0.335 | 0.07 |
| IPI00302925 | Uncharacterized protein CCT8                                                       | CCT8     | 4   | 11 | 13  | 2.29 | 0.591 | 0.04 |
| IPI00302927 | T-complex protein 1 subunit delta                                                  | CCT4     | 2   | 6  | 4   | 2.23 | 0.202 | 0.00 |
| IPI00303318 | Protein FAM49B                                                                     | FAM49B   | 2   | 4  | 2   | 0.90 | 0.329 | 0.26 |
| IPI00303476 | ATP synthase subunit beta. mitochondrial precursor                                 | ATP5B    | 22  | 21 | 16  | 0.81 | 0.264 | 0.09 |
| IPI00303894 | Protein FAM3A precursor                                                            | FAM3A    | 0   | 2  | 2   | 1.73 | 0.379 | 0.03 |
| IPI00304331 | Galactosylgalactosylxylosylprotein 3-beta-glucuronosyltransferase 3                | B3GAT3   | 2   | 1  | 4   | 1.31 | 0.578 | 0.18 |
| IPI00304589 | Isoform 1 of 182 kDa tankyrase 1-binding protein                                   | TNKS1BP1 | 5   | 2  | 7   | 1.10 | 0.284 | 0.24 |
| IPI00304693 | Isoform 2 of Nucleoporin-like protein RIP                                          | HRB      | 1   | 3  | 3   | 1.24 | 0.530 | 0.21 |
| IPI00304925 | Heat shock 70 kDa protein 1                                                        | HSPA1A   | 9   | 11 | 14  | 1.20 | 0.574 | 0.25 |
| IPI00305166 | Succinate dehydrogenase [ubiquinone] flavoprotein subunit. mitochondrial precursor | SDHA     | 6   | 7  | 2   | 0.88 | 0.497 | 0.30 |
| IPI00305383 | Cytochrome b-c1 complex subunit 2. mitochondrial precursor                         | UQCRC2   | 2   | 2  | 4   | 0.92 | 0.339 | 0.31 |
| IPI00305423 | Charged multivesicular body protein 6                                              | CHMP6    | 3   | 3  | 2   | 1.98 | 0.623 | 0.06 |

|             |                                                                                                                                                |           |    |    |    |      |       |      |
|-------------|------------------------------------------------------------------------------------------------------------------------------------------------|-----------|----|----|----|------|-------|------|
| IPI00305551 | Guanine nucleotide-binding protein subunit alpha-11<br>Isoform 1 of EGF-like repeat and discoidin I-like domain-containing protein 3 precursor | GNA11     | 2  | 3  | 6  | 0.97 | 0.146 | 0.32 |
| IPI00306046 |                                                                                                                                                | EDIL3     | 2  | 2  | 3  | 1.47 | 0.350 | 0.05 |
| IPI00306332 | 60S ribosomal protein L24                                                                                                                      | RPL24     | 5  | 2  | 3  | 0.99 | 0.380 | 0.47 |
| IPI00306604 | Integrin alpha-5 precursor                                                                                                                     | ITGA5     | 14 | 12 | 16 | 0.94 | 0.132 | 0.18 |
| IPI00306825 | Isoform 1 of Tumor protein D54                                                                                                                 | TPD52L2   | 8  | 6  | 9  | 1.91 | 0.846 | 0.10 |
| IPI00307155 | Rho-associated protein kinase 2                                                                                                                | ROCK2     | 10 | 7  | 15 | 1.24 | 0.598 | 0.23 |
| IPI00328161 | FK506-binding protein 8                                                                                                                        | FKBP8     | 1  | 3  | 2  | 1.49 | 0.234 | 0.03 |
| IPI00328180 | Isoform 1 of Ras-related protein Rab-34                                                                                                        | RAB34     | 2  | 1  | 2  | 0.98 | 0.395 | 0.45 |
| IPI00328391 | N-acetylgalactosaminyltransferase 7                                                                                                            | GALNT7    | 5  | 10 | 9  | 1.24 | 0.065 | 0.01 |
| IPI00328415 | Isoform 1 of NADH-cytochrome b5 reductase 3                                                                                                    | CYB5R3    | 2  | 2  | 2  | 1.37 | 0.235 | 0.04 |
| IPI00328715 | Protein LYRIC                                                                                                                                  | MTDH      | 0  | 3  | 3  | 1.30 | 0.149 | 0.02 |
| IPI00328840 | THO complex subunit 4                                                                                                                          | THOC4     | 5  | 3  | 3  | 0.98 | 0.835 | 0.48 |
| IPI00329332 | Syntaxin-12                                                                                                                                    | STX12     | 3  | 3  | 4  | 1.29 | 0.610 | 0.21 |
| IPI00329389 | 60S ribosomal protein L6                                                                                                                       | RPL6      | 5  | 3  | 5  | 0.76 | 0.069 | 0.00 |
| IPI00329572 | Uncharacterized protein PACSIN3                                                                                                                | PACSIN3   | 9  | 10 | 13 | 1.07 | 0.129 | 0.17 |
| IPI00329672 | Myosin-Ie                                                                                                                                      | MYO1E     | 1  | 2  | 3  | 1.18 | 0.324 | 0.17 |
| IPI00329801 | Annexin A5                                                                                                                                     | ANXA5     | 14 | 18 | 14 | 1.17 | 1.170 | 0.38 |
| IPI00333619 | Isoform 1 of Fatty aldehyde dehydrogenase                                                                                                      | ALDH3A2   | 1  | 3  | 3  | 1.43 | 0.192 | 0.02 |
| IPI00334190 | Stomatin-like protein 2                                                                                                                        | STOML2    | 5  | 8  | 7  | 0.84 | 0.281 | 0.13 |
| IPI00334282 | Uncharacterized protein ENSP00000310532                                                                                                        | FAM3C     | 4  | 6  | 8  | 1.65 | 0.779 | 0.12 |
| IPI00335168 | Isoform Non-muscle of Myosin light polypeptide 6                                                                                               | MYL6      | 7  | 9  | 9  | 1.54 | 0.361 | 0.05 |
| IPI00337415 | Guanine nucleotide-binding protein G(i). alpha-1 subunit                                                                                       | GNAI1     | 1  | 3  | 7  | 1.09 | 0.247 | 0.24 |
| IPI00337541 | NAD(P) transhydrogenase. mitochondrial precursor                                                                                               | NNT       | 5  | 10 | 2  | 0.87 | 0.115 | 0.05 |
| IPI00337612 | Discoidin. CUB and LCCL domain-containing protein 1 precursor                                                                                  | DCBLD1    | 2  | 2  | 2  | 1.15 | 0.234 | 0.13 |
| IPI00337800 | Isoform 1 of Disheveled-associated activator of morphogenesis 1                                                                                | DAAM1     | 1  | 4  | 3  | 0.80 | 0.279 | 0.09 |
| IPI00339384 | Isoform 1 of Retinol dehydrogenase 11                                                                                                          | RDH11     | 2  | 1  | 2  | 1.28 | 0.412 | 0.14 |
| IPI00374054 | Isoform 2 of Protein enabled homolog                                                                                                           | ENAH      | 3  | 5  | 4  | 0.99 | 0.142 | 0.46 |
| IPI00374563 | Agrin precursor                                                                                                                                | AGRN      | 5  | 4  | 3  | 1.16 | 0.084 | 0.02 |
| IPI00374590 | Cancer susceptibility candidate 4 isoform a                                                                                                    | CASC4     | 2  | 1  | 7  | 1.58 | 0.409 | 0.05 |
| IPI00374970 | Isoform 1 of Septin-10                                                                                                                         | SEPT10    | 7  | 2  | 6  | 0.68 | 0.652 | 0.14 |
| IPI00376394 | Uncharacterized protein QSOX2                                                                                                                  | QSOX2     |    |    |    | 1.92 | 0.744 | 0.08 |
| IPI00376427 | Neural cell adhesion molecule 2 precursor                                                                                                      | NCAM2     | 3  | 4  | 12 | 1.00 | 0.205 | 0.50 |
| IPI00376798 | Isoform 1 of 60S ribosomal protein L11                                                                                                         | RPL11     | 5  | 4  | 5  | 0.83 | 0.295 | 0.13 |
| IPI00383423 | Isoform 1 of Coiled-coil domain-containing protein 50                                                                                          | CCDC50    | 0  | 2  | 6  | 1.49 | 0.998 | 0.21 |
| IPI00384909 | KIDINS220 protein                                                                                                                              | KIDINS220 | 2  | 4  | 2  | 0.81 | 0.637 | 0.25 |

|             |                                                                                       |           |    |    |    |      |       |      |
|-------------|---------------------------------------------------------------------------------------|-----------|----|----|----|------|-------|------|
| IPI00385449 | Protein kinase C alpha type                                                           | PRKCA     | 6  | 5  | 3  | 0.88 | 0.359 | 0.24 |
| IPI00386271 | Calcium-binding mitochondrial carrier protein Aralar1                                 | SLC25A12  | 2  | 3  | 2  | 0.95 | 0.132 | 0.22 |
| IPI00387144 | Tubulin alpha-1B chain                                                                | TUBA1B    | 2  | 2  | 1  | 1.23 | 0.970 | 0.33 |
| IPI00387156 | Isoform 2 of Sodium bicarbonate cotransporter 3                                       | SLC4A7    | 3  | 3  | 4  | 1.12 | 0.107 | 0.06 |
| IPI00394809 | Apolipoprotein O-like precursor                                                       | APOOL     | 1  | 4  | 2  | 0.81 | 0.397 | 0.16 |
| IPI00395488 | Vasorin precursor                                                                     | VASN      | 1  | 2  | 2  | 1.42 | 0.548 | 0.12 |
| IPI00395887 | Thioredoxin domain-containing protein 1 precursor                                     | TXNDC1    | 2  | 3  | 2  | 1.52 | 0.532 | 0.09 |
| IPI00395906 | Similar to RIKEN cDNA 2310002J15 gene                                                 | MGC59937  | 2  | 2  | 3  | 1.35 | 0.163 | 0.02 |
| IPI00396321 | Leucine-rich repeat-containing protein 59                                             | LRRC59    | 6  | 5  | 10 | 1.15 | 0.323 | 0.20 |
| IPI00396378 | Isoform B1 of Heterogeneous nuclear ribonucleoproteins A2/B1                          | HNRNPA2B1 | 2  | 3  | 5  | 0.98 | 0.273 | 0.43 |
| IPI00397526 | Isoform 1 of Myosin-10                                                                | MYH10     | 1  | 6  | 9  | 1.02 | 0.669 | 0.48 |
| IPI00397949 | G protein-coupled receptor 56 isoform b                                               | GPR56     | 4  | 5  | 6  | 1.15 | 0.566 | 0.30 |
| IPI00399089 | Mesoderm development candidate 2                                                      | MESDC2    | 1  | 2  | 3  | 1.14 | 0.212 | 0.13 |
| IPI00401264 | Thioredoxin domain-containing protein 4 precursor                                     | TXNDC4    | 2  | 2  | 2  | 1.29 | 0.579 | 0.19 |
| IPI00402183 | Isoform 3 of Heterogeneous nuclear ribonucleoprotein Q                                | SYNCRIP   | 4  | 6  | 5  | 0.86 | 0.184 | 0.09 |
| IPI00409635 | Isoform 2 of Protein FAM62B                                                           | FAM62B    | 3  | 7  | 4  | 1.17 | 0.107 | 0.03 |
| IPI00410693 | Isoform 1 of Plasminogen activator inhibitor 1 RNA-binding protein                    | SERBP1    | 1  | 11 | 13 | 0.81 | 0.112 | 0.02 |
| IPI00412579 | 60S ribosomal protein L10a                                                            | RPL10A    | 4  | 1  | 3  | 0.80 | 0.272 | 0.09 |
| IPI00412607 | 60S ribosomal protein L35                                                             | RPL35     | 3  | 1  | 2  | 0.68 | 0.172 | 0.02 |
| IPI00412737 | Tryptophanyl-tRNA synthetase isoform b                                                | WARS      | 3  | 1  | 1  | 1.12 | 0.729 | 0.37 |
| IPI00413108 | Ribosomal protein SA                                                                  | RPSA      | 2  | 5  | 6  | 0.65 | 0.288 | 0.03 |
| IPI00413293 | Isoform 1 of Torsin-1A precursor                                                      | TOR1A     | 1  | 2  | 3  | 1.58 | 0.556 | 0.09 |
| IPI00413895 | Golgin subfamily A member 2                                                           | GOLGA2    | 3  | 10 | 3  | 1.46 | 0.499 | 0.10 |
| IPI00414320 | Annexin A11                                                                           | ANXA11    | 10 | 11 | 13 | 1.17 | 0.364 | 0.20 |
| IPI00414554 | Actin-related protein 2/3 complex subunit 5-like protein                              | ARPC5L    | 3  | 3  | 2  | 0.94 | 0.426 | 0.37 |
| IPI00414676 | Heat shock protein HSP90-beta                                                         | HSP90AB1  | 3  | 10 | 7  | 1.20 | 0.786 | 0.31 |
| IPI00414717 | Golgi apparatus glycoprotein 1                                                        | GLG1      | 7  | 11 | 11 | 2.42 | 0.264 | 0.01 |
| IPI00418169 | Annexin A2 isoform 1                                                                  | ANXA2     | 39 | 34 | 41 | 0.86 | 0.082 | 0.02 |
| IPI00418262 | Fructose-bisphosphate aldolase C                                                      | ALDOC     | 1  | 2  | 2  | 1.57 | 0.598 | 0.10 |
| IPI00418471 | Vimentin                                                                              | VIM       | 22 | 29 | 39 | 0.85 | 0.460 | 0.24 |
| IPI00418497 | Isoform 2 of Import inner membrane translocase subunit TIM50. mitochondrial precursor | TIMM50    | 2  | 5  | 4  | 0.81 | 0.409 | 0.16 |
| IPI00419585 | Peptidyl-prolyl cis-trans isomerase A                                                 | PPIA      | 10 | 5  | 8  | 1.35 | 0.621 | 0.17 |
| IPI00419880 | 40S ribosomal protein S3a                                                             | RPS3A     | 10 | 9  | 7  | 0.70 | 0.200 | 0.02 |
| IPI00423570 | Isoform 2B of GTPase KRas precursor                                                   | KRAS      | 6  | 3  | 7  | 1.29 | 0.309 | 0.09 |



|             |                                                                                        |                 |    |    |    |      |       |      |
|-------------|----------------------------------------------------------------------------------------|-----------------|----|----|----|------|-------|------|
| IPI00438286 | Isoform 1 of Protein LAP2                                                              | ERBB2IP         | 5  | 8  | 13 | 1.01 | 0.287 | 0.47 |
| IPI00440493 | ATP synthase subunit alpha. mitochondrial precursor                                    | ATP5A1          | 26 | 18 | 18 | 0.84 | 0.319 | 0.16 |
| IPI00441498 | Folate receptor alpha precursor                                                        | FOLR1           | 7  | 4  | 7  | 1.17 | 0.131 | 0.05 |
| IPI00442073 | Cysteine and glycine-rich protein 1                                                    | CSRP1           | 11 | 5  | 8  | 0.84 | 0.169 | 0.06 |
| IPI00453116 | Secretory carrier membrane protein 3 isoform 1                                         | SCAMP3          | 6  | 6  | 7  | 1.31 | 0.800 | 0.24 |
| IPI00453476 | Uncharacterized protein ENSP00000348237                                                | ENSP00000348237 | 2  | 2  | 7  | 1.20 | 0.636 | 0.28 |
| IPI00456925 | Isoform 1 of Drebrin-like protein                                                      | DBNL            | 11 | 10 | 16 | 0.80 | 0.121 | 0.02 |
| IPI00465248 | Isoform alpha-enolase of Alpha-enolase                                                 | ENO1            | 9  | 7  | 17 | 1.05 | 0.589 | 0.43 |
| IPI00465361 | 60S ribosomal protein L13                                                              | RPL13           | 8  | 5  | 5  | 0.67 | 0.375 | 0.06 |
| IPI00465431 | Galectin-3                                                                             | LGALS3          | 4  | 3  | 6  | 1.84 | 0.482 | 0.04 |
| IPI00465436 | Catalase                                                                               | CAT             | 4  | 3  | 2  | 1.16 | 0.931 | 0.37 |
| IPI00465439 | Fructose-bisphosphate aldolase A                                                       | ALDOA           | 12 | 10 | 15 | 1.52 | 0.406 | 0.06 |
| IPI00470360 | Isoform 1 of Kin of IRRE-like protein 1 precursor                                      | KIRREL          | 1  | 4  | 7  | 0.81 | 0.531 | 0.22 |
| IPI00470467 | NADPH-cytochrome P450 reductase                                                        | POR             | 2  | 2  | 4  | 1.39 | 0.165 | 0.02 |
| IPI00470535 | Dihydropyridine receptor alpha 2 subunit                                               | CACNA2D1        | 11 | 7  | 20 | 1.11 | 0.087 | 0.05 |
| IPI00472164 | Wiskott-Aldrich syndrome protein family member 2                                       | WASF2           | 2  | 2  | 2  | 1.22 | 0.910 | 0.32 |
| IPI00472882 | HLA class I histocompatibility antigen. A-68 alpha chain precursor                     | HLA-A           | 11 | 11 | 17 | 1.23 | 0.028 | 0.00 |
| IPI00478231 | Uncharacterized protein RHOA                                                           | RHOA            | 5  | 5  | 8  | 1.19 | 0.196 | 0.08 |
| IPI00479186 | Isoform M2 of Pyruvate kinase isozymes M1/M2                                           | PKM2            | 23 | 15 | 17 | 1.33 | 0.705 | 0.21 |
| IPI00479786 | Isoform 1 of Far upstream element-binding protein 2                                    | KHSRP           | 2  | 4  | 2  | 0.88 | 0.568 | 0.31 |
| IPI00479997 | Stathmin                                                                               | STMN1           | 2  | 3  | 7  | 1.01 | 0.571 | 0.48 |
| IPI00514055 | Isoform Gnas-1 of Guanine nucleotide-binding protein G(s) subunit alpha isoforms short | GNAS            | 3  | 4  | 9  | 1.03 | 0.044 | 0.10 |
| IPI00550234 | Isoform 1 of Actin-related protein 2/3 complex subunit 5                               | ARPC5           | 7  | 1  | 3  | 1.00 | 0.199 | 0.48 |
| IPI00550363 | Transgelin-2                                                                           | TAGLN2          | 12 | 5  | 16 | 0.80 | 0.324 | 0.11 |
| IPI00550523 | Isoform 1 of Atlastin-3                                                                | DKFZP564J0863   | 1  | 2  | 5  | 1.04 | 0.245 | 0.35 |
| IPI00550689 | UPF0027 protein C22orf28                                                               | C22orf28        | 2  | 2  | 1  | 0.87 | 0.462 | 0.26 |
| IPI00554521 | Ferritin heavy chain                                                                   | FTH1            | 6  | 1  | 1  | 1.02 | 0.595 | 0.47 |
| IPI00554737 | Serine/threonine-protein phosphatase 2A 65 kDa regulatory subunit A alpha isoform      | PPP2R1A         | 2  | 4  | 3  | 1.17 | 0.372 | 0.20 |
| IPI00554811 | Actin-related protein 2/3 complex subunit 4                                            | ARPC4           | 4  | 4  | 5  | 1.00 | 0.509 | 0.50 |
| IPI00619951 | Uncharacterized protein TPD52                                                          | TPD52           | 6  | 6  | 4  | 2.37 | 0.767 | 0.05 |
| IPI00641181 | MARCKS-related protein                                                                 | MARCKSL1        | 3  | 3  | 4  | 2.41 | 0.870 | 0.06 |
| IPI00641950 | Lung cancer oncogene 7                                                                 | GNB2L1          | 4  | 3  | 2  | 0.76 | 0.349 | 0.10 |
| IPI00643920 | Transketolase                                                                          | TKT             | 10 | 6  | 12 | 1.15 | 0.741 | 0.34 |
| IPI00644712 | ATP-dependent DNA helicase 2 subunit 1                                                 | XRCC6           | 2  | 8  | 10 | 1.03 | 0.532 | 0.45 |

|             |                                                                                  |          |    |    |    |      |       |      |
|-------------|----------------------------------------------------------------------------------|----------|----|----|----|------|-------|------|
| IPI00645194 | Integrin beta 1 isoform 1A precursor                                             | ITGB1    | 18 | 16 | 28 | 0.99 | 0.202 | 0.46 |
| IPI00645815 | Solute carrier family 9 isoform 3 regulator 2                                    | SLC9A3R2 | 11 | 10 | 15 | 0.77 | 0.143 | 0.02 |
| IPI00646083 | HLA class I histocompatibility antigen. B-15 alpha chain precursor               | HLA-C    | 2  | 1  | 4  | 0.89 | 0.341 | 0.24 |
| IPI00646304 | Peptidylprolyl isomerase B precursor                                             | PPIB     | 9  | 9  | 12 | 1.22 | 0.349 | 0.15 |
| IPI00654584 | Isoform 4 of Neuroplastin precursor                                              | NPTN     | 0  | 1  | 4  | 0.82 | 0.236 | 0.08 |
| IPI00656088 | Isoform 1 of Ras-associated and pleckstrin homology domains-containing protein 1 | RAPH1    | 2  | 2  | 1  | 1.35 | 0.624 | 0.18 |
| IPI00743716 | HLA class I histocompatibility antigen. Cw-12 alpha chain precursor              | HLA-C    | 3  | 3  | 9  | 1.16 | 0.115 | 0.04 |
| IPI00746388 | Ezrin                                                                            | VIL2     | 7  | 11 | 13 | 1.15 | 1.103 | 0.39 |
| IPI00747849 | Uncharacterized protein ATP1B1                                                   | ATP1B1   | 3  | 2  | 4  | 0.86 | 0.234 | 0.12 |
| IPI00784154 | 60 kDa heat shock protein. mitochondrial precursor                               | HSPD1    | 38 | 30 | 32 | 1.02 | 1.303 | 0.48 |
| IPI00784156 | Isoform 1 of AP-2 complex subunit beta-1                                         | AP2B1    | 4  | 4  | 1  | 1.04 | 0.699 | 0.45 |
| IPI00789008 | Flotillin 2                                                                      | FLOT2    | 11 | 10 | 18 | 1.58 | 0.142 | 0.01 |
| IPI00789324 | JUP protein                                                                      | JUP      | 14 | 15 | 18 | 1.03 | 0.102 | 0.27 |
| IPI00790010 | Isoform 1 of PTB domain-containing engulfment adapter protein 1                  | GULP1    | 2  | 1  | 4  | 1.07 | 0.475 | 0.37 |
| IPI00793199 | Annexin IV                                                                       | ANXA4    | 12 | 10 | 11 | 1.26 | 0.566 | 0.21 |
| IPI00793874 | Sideroflexin 3                                                                   | SFXN3    | 3  | 5  | 4  | 0.92 | 0.183 | 0.18 |
| IPI00794397 | Chromatin modifying protein 4A                                                   | CHMP4A   | 3  | 3  | 3  | 1.16 | 0.108 | 0.04 |
| IPI00797747 | 11 kDa protein                                                                   | SRPRB    | 7  | 5  | 11 | 1.21 | 0.645 | 0.27 |
| IPI00844215 | Isoform 1 of Spectrin alpha chain. brain                                         | SPTAN1   | 36 | 54 | 53 | 0.82 | 0.712 | 0.28 |
| IPI00844394 | 42 kDa protein                                                                   | CYR61    | 21 | 19 | 24 | 0.65 | 1.003 | 0.20 |
| IPI00844578 | ATP-dependent RNA helicase A                                                     | DHX9     | 2  | 2  | 1  | 0.83 | 0.528 | 0.24 |
| IPI00853369 | Plexin-B2 precursor                                                              | PLXNB2   | 10 | 8  | 11 | 0.98 | 0.099 | 0.36 |
| IPI00855763 | Isoform 3 of Palladin                                                            | PALLD    | 13 | 12 | 18 | 0.71 | 0.391 | 0.08 |
| IPI00856045 | AHNAK nucleoprotein 2                                                            | AHNAK2   | 13 | 40 | 11 | 0.80 | 0.137 | 0.03 |
| IPI00867509 | Coronin-1C protein                                                               | CORO1C   | 6  | 6  | 9  | 0.96 | 0.400 | 0.41 |
| IPI00872814 | Uncharacterized protein MSN                                                      | MSN      | 9  | 7  | 8  | 1.35 | 1.332 | 0.32 |

<sup>a,b,c</sup> Pept ID; Number of unique peptides used for protein identification in experiment a, b and c

<sup>d</sup> Mean ratio is the average ratio of the three independent experiments

<sup>e</sup> Stdev (ratio) is the standard error of the mean ratio
